# Supplementary material for: Genome scan linkage analysis identifies a major quantitative trait loci for fatty acid composition in longissimus dorsi muscle in an F2 intercross between Landrace and Korean native pigs
Source: PubMed Central journal article supplement — Asian-Australas J Anim Sci. 2017 Jan 2;30(8):1061–5. doi: 10.5713/ajas.16.0562 (PMC5494477; doi:10.5713/ajas.16.0562), 2017-01-02
Supplement: ajas-30-8-1061-supplementary.pdf [file ajas-30-8-1061-supplementary.pdf]

1 Supplementary Table 1. Summary of identified suggestive QTLs for fatty acid composition

| SSC  | Trait | Position          | F-ratio <sup>1</sup> | Inheritance of MODE <sup>2</sup> | %Var <sup>3</sup> | SI marker interval <sup>4</sup> | Reference <sup>5</sup>                                                                                                                       |
|------|-------|-------------------|----------------------|----------------------------------|-------------------|---------------------------------|----------------------------------------------------------------------------------------------------------------------------------------------|
| 1    | C10:0 | 167               | 8.6 <sup>†</sup>     | A                                | 0.9               | SW1957-SW1307                   | Ramayo-Caldas et al. (2012)                                                                                                                  |
|      | C16:1 | 123               | 9.6 <sup>†</sup>     | A                                | 1.0               | SW962-SW1957                    |                                                                                                                                              |
|      | C17:1 | 167               | 7.5 <sup>†</sup>     | AD                               | 1.5               | SW373-SW1301                    |                                                                                                                                              |
|      | C18:2 | 111               | 6.5 <sup>†</sup>     | AD                               | 1.3               | SW1417-SW1301                   |                                                                                                                                              |
|      | C20:4 | 167               | 8.4 <sup>†</sup>     | AD                               | 1.7               | SW974-SW1301                    |                                                                                                                                              |
|      | MUFA  | 0                 | 12.8 <sup>†</sup>    | A                                | 1.3               | SW1514-SW1515                   |                                                                                                                                              |
|      | PUFA  | 167               | 6.5 <sup>†</sup>     | AD                               | 1.3               | SW2035-SW1301                   |                                                                                                                                              |
| 2    | C17:1 | 10                | 12.1 <sup>†</sup>    | A                                | 1.2               | SW2623-SW776                    | Ramayo-Caldas et al. (2012)                                                                                                                  |
|      | C18:3 | 17                | 8.1 <sup>†</sup>     | A                                | 0.8               | SW2623-S0370                    |                                                                                                                                              |
|      | C20:0 | 105               | 8.2 <sup>†</sup>     | A                                | 0.8               | SW2623-SW1879                   |                                                                                                                                              |
|      | C20:4 | 23                | 6.9 <sup>†</sup>     | A                                | 0.7               | SW2623-SW1879                   |                                                                                                                                              |
|      | SFA   | 25                | 11.7 <sup>†</sup>    | A                                | 1.2               | SW2623-S0370                    |                                                                                                                                              |
|      | UFA   | 22                | 10.3 <sup>†</sup>    | A                                | 1.1               | SW2623-SW1879                   |                                                                                                                                              |
| 3    | C12:0 | 0                 | 13.5 <sup>†</sup>    | A                                | 1.4               | APR22-SW2021                    | Ramayo-Caldas et al. (2012)                                                                                                                  |
|      | C18:3 | 69                | 8.1 <sup>†</sup>     | A                                | 0.8               | APR22-SW1327                    |                                                                                                                                              |
| 4    | C16:1 | 88                | 6.1 <sup>†</sup>     | AD                               | 1.3               | SW489-MP77                      | Pérez-Enciso et al. (2000) and Ramayo-Caldas et al. (2012)                                                                                   |
|      | C18:0 | 93                | 7.4 <sup>†</sup>     | AD                               | 1.5               | SW1364-MP77                     |                                                                                                                                              |
|      | C18:1 | 44                | 7.7 <sup>†</sup>     | A                                | 0.8               | SW489-MP77                      |                                                                                                                                              |
|      | C18:2 | 44                | 6.9 <sup>†</sup>     | A                                | 0.7               | SW489-MP77                      |                                                                                                                                              |
| 5    | MUFA  | 42                | 6.9 <sup>†</sup>     | A                                | 0.7               | SW489-MP77                      | Pérez-Enciso et al. (2000), Nii et al. (2006), Guo et al. (2009), Uemoto et al. (2009), Ramayo-Caldas et al. (2012) and Uemoto et al. (2012) |
|      | PUFA  | 79                | 12.2 <sup>†</sup>    | A                                | 1.3               | APR8-SW122                      |                                                                                                                                              |
| 5    | C12:0 | 101               | 8.4 <sup>†</sup>     | A                                | 0.9               | SW2003-SW967                    | Uemoto et al. (2009)                                                                                                                         |
|      | C18:2 | 123               | 7.1 <sup>†</sup>     | A                                | 0.7               | SW2003-SW967                    |                                                                                                                                              |
|      | C20:0 | 122               | 8.8 <sup>†</sup>     | A                                | 0.9               | SW963-SW967                     |                                                                                                                                              |
| 6    | C12:0 | 14                | 7.9 <sup>†</sup>     | AD                               | 1.6               | S0035-SW1057                    | Lee et al. (2010) and Ramayo-Caldas et al. (2012)                                                                                            |
|      | C17:1 | 79                | 9.1 <sup>†</sup>     | A                                | 0.9               | SW2406-S0059                    |                                                                                                                                              |
|      | C18:1 | 79                | 9.6 <sup>†</sup>     | A                                | 1.0               | APR8-SW1055                     |                                                                                                                                              |
|      | C18:2 | 79                | 12.2 <sup>†</sup>    | A                                | 1.3               | APR8-SW122                      |                                                                                                                                              |
|      | MUFA  | 79                | 8.3 <sup>†</sup>     | A                                | 0.9               | APR8-SW1055                     |                                                                                                                                              |
| 6    | PUFA  | 79                | 12.2 <sup>†</sup>    | A                                | 1.3               | APR8-S0059                      | Lee et al. (2010)                                                                                                                            |
|      | C14:0 | 134               | 8.8 <sup>†</sup>     | A                                | 0.9               | SW147-SW764                     | Guo et al. (2009)                                                                                                                            |
|      | C18:3 | 94                | 10.5 <sup>†</sup>    | A                                | 0.7               | SW1369-SW764                    |                                                                                                                                              |
| PUFA | 62    | 12.8 <sup>†</sup> | A                    | 1.3                              | SW1369-SW2108     |                                 |                                                                                                                                              |
| 8    | C12:0 | 116               | 9.9 <sup>†</sup>     | A                                | 1.0               | SW1345-KS188                    | Uemoto et al. (2012)                                                                                                                         |
|      | MUFA  | 4                 | 7.4 <sup>†</sup>     | A                                | 0.8               | SW2410-SW444                    |                                                                                                                                              |
| 9    | C10:0 | 145               | 6.0 <sup>†</sup>     | AD                               | 1.2               | SW2093-SW749                    | Uemoto et al. (2012)                                                                                                                         |
|      | C16:1 | 145               | 7.7 <sup>†</sup>     | AD                               | 1.6               | SW2093-SW749                    |                                                                                                                                              |
| 10   | C16:0 | 54                | 9.1 <sup>†</sup>     | A                                | 1.0               | SWR136-SW2000                   | Uemoto et al. (2012)                                                                                                                         |
| 11   | C12:0 | 47                | 5.3 <sup>†</sup>     | AD                               | 1.1               | SW1460-SW1135                   |                                                                                                                                              |

|    |       |     |                   |    |     |               |                   |
|----|-------|-----|-------------------|----|-----|---------------|-------------------|
|    | C18:1 | 61  | 6.5 <sup>†</sup>  | A  | 0.7 | SW1460-SW1135 |                   |
|    | MUFA  | 61  | 7.2 <sup>†</sup>  | A  | 0.7 | SW1460-SW1135 |                   |
| 12 | C16:1 | 115 | 12.9 <sup>†</sup> | A  | 1.3 | SO106-SWR1021 |                   |
| 13 | C10:0 | 62  | 9.3 <sup>†</sup>  | A  | 1.0 | S0288-SW38    |                   |
|    | C16:1 | 74  | 12.5 <sup>†</sup> | A  | 1.3 | SW1407-SW38   | Guo et al. (2009) |
|    | C18:2 | 29  | 9.4 <sup>†</sup>  | A  | 1.0 | SWR1941-SW38  |                   |
|    | C20:0 | 24  | 6.4 <sup>†</sup>  | AD | 1.3 | SWR1941-S0215 |                   |
|    | C20:1 | 29  | 10.5 <sup>†</sup> | A  | 1.1 | SW1378-S0283  |                   |
|    | PUFA  | 29  | 8.0 <sup>†</sup>  | A  | 0.8 | SWR1941-SW38  |                   |
| 14 | C10:0 | 64  | 10.0 <sup>†</sup> | A  | 1.0 | SW2038-SW2515 |                   |
|    | C17:0 | 58  | 8.7 <sup>†</sup>  | A  | 0.9 | SW2038-SW2515 |                   |
|    | C20:4 | 14  | 6.9 <sup>†</sup>  | A  | 0.7 | SW857-SW2515  |                   |
| 15 | C20:0 | 78  | 9.1 <sup>†</sup>  | A  | 0.9 | SW1989-S0040  |                   |
|    | C20:1 | 130 | 6.7 <sup>†</sup>  | AD | 1.4 | SW936-SWR2121 |                   |
|    | MUFA  | 141 | 6.0 <sup>†</sup>  | AD | 1.2 | KS135-SWR2121 |                   |
| 16 | C12:0 | 43  | 5.9 <sup>†</sup>  | AD | 1.2 | SW419-SW2517  |                   |
|    | C17:0 | 59  | 6.5 <sup>†</sup>  | AD | 1.3 | SW1809-S0105  |                   |
|    | C17:1 | 54  | 8.0 <sup>†</sup>  | AD | 1.6 | SW419-SW2517  |                   |
|    | C18:1 | 55  | 7.3 <sup>†</sup>  | AD | 1.5 | SW1035-SW1897 |                   |
|    | C18:2 | 53  | 5.0 <sup>†</sup>  | AD | 1.0 | SW1035-SW1897 |                   |
|    | C20:4 | 41  | 7.1 <sup>†</sup>  | AD | 1.5 | SW419-SW2517  |                   |
|    | MUFA  | 56  | 6.8 <sup>†</sup>  | AD | 1.4 | SW1035-SW1897 |                   |
|    | PUFA  | 52  | 5.6 <sup>†</sup>  | AD | 1.2 | SW1035-SW1897 |                   |
| 17 | C10:0 | 11  | 11.1 <sup>†</sup> | A  | 1.1 | SW1031-SW2142 |                   |
| 18 | C10:0 | 22  | 6.7 <sup>†</sup>  | AD | 1.4 | SY4-S0062     |                   |
|    | C16:1 | 24  | 10.2 <sup>†</sup> | A  | 1.1 | SY4-SB58      |                   |

1 <sup>1</sup>Test statistic and level of significance: <sup>†</sup>suggestive 5% significance.

2 <sup>2</sup>A represents additive effect; AD represents additive and dominance effects.

3 <sup>3</sup>Flanking markers for 95% support intervals estimated by the 1.5-LOD drop method.

4 <sup>4</sup>Var % is the reduction in residual variance of the F<sub>2</sub> population obtained by inclusion of a  
5 QTL at the given position.

6 <sup>5</sup>Papers reporting QTL with similar effects at comparable positions in PigQTLdb.

7

8

## 9 References

10 Clop, A., C. Ovilo, M. Perez-Enciso, A. Cercos, A. Tomas, A. Fernandez, A. Coll, J. M.  
11 Folch, C. Barragan, I. Diaz I., M. A. Oliver, L. Varona, L. Silio, A. Sanchez and J. L.  
12 Noguera. 2003. Detection of QTL affecting fatty acid composition in the pig. *Mamm.*  
13 *Genome* 14: 650-656.

- 1 Guo, T., J. Ren, K. Yang, J. Ma, Z. Zhang and L. Huang L. 2009. Quantitative trait loci for  
2 fatty acid composition in longissimus dorsi and abdominal fat: results from a White  
3 Duroc x Erhualian intercross F2 population. *Anim. Genet.* 40: 185-191.
- 4 Kim, Y., M. Kong, Y. J. Nam and C. Lee. 2006. A quantitative trait locus for oleic fatty acid  
5 content on *Sus scrofa* chromosome 7. *J. Hered.* 97: 535-537.
- 6 Lee, S.H., Y. M. Choi, J. H. Choe, J. M. Kim, K. C. Hong, H. C. Park and B. C. Kim. 2010.  
7 Association between polymorphisms of the heart fatty acid binding protein gene and  
8 intramuscular fat content, fatty acid composition, and meat quality in Berkshire breed.  
9 *Meat Sci.* 86: 794-800.
- 10 Nii, M., T. Hayashi, F. Tani, A. Niki, N. Mori, N. Fujishima-Kanaya, M. Komatsu, K.  
11 Aikawa, T. Awata and S. Mikawa S. Quantitative trait loci mapping for fatty acid  
12 composition traits in perirenal and back fat using a Japanese wild boar x Large White  
13 intercross. *Anim. Genet.* 37: 342-347.
- 14 Pérez-Enciso, M., A. Clop, J. L. Noguera, C. Ovilo, A. Coll, J. M. Folch, D. Babot, J. Estany,  
15 M. A. Oliver, I. Díaz and A. Sánchez. 2000. A QTL on pig chromosome 4 affects  
16 fatty acid metabolism: evidence from an Iberian by Landrace intercross. *J. Anim. Sci.*  
17 78: 2525-2531.
- 18 Ramayo-Caldas, Y., A. Mercadé, A. Castelló, B. Yang, C. Rodríguez, E. Alves, I. Díaz, N.  
19 Ibáñez-Escriche, J. L. Noguera, M. Pérez-Enciso, A. I. Fernández and J. M. Folch.  
20 2012. Genome-wide association study for intramuscular fatty acid composition in an  
21 Iberian × Landrace cross. *J. Anim. Sci.* 90: 2883-2893.
- 22 Uemoto, Y., S. Sato, C. Ohnishi, S. Terai, A. Komatsuda and E. Kobayashi. 2009. The effects  
23 of single and epistatic quantitative trait loci for fatty acid composition in a Meishan x  
24 Duroc crossbred population. *J. Anim. Sci.* 87: 3470-3476.
- 25 Uemoto, Y., Y. Soma, S. Sato, M. Ishida, T. Shibata, H. Kadowaki, E. Kobayashi and K.  
26 Suzuki K. 2012. Genome-wide mapping for fatty acid composition and melting point  
27 of fat in a purebred Duroc pig population. *Anim. Genet.* 43: 27-34.
